# Supplementary material for: The Protective Effects of Live and Pasteurized Akkermansia muciniphila and Its Extracellular Vesicles against HFD/CCl4-Induced Liver Injury
Source: PubMed Central journal article supplement (PMC8557882; doi:10.1128/spectrum.00484-21), 2021-09-22
Supplement: spectrum00484-21_supp_1_seq17.pdf [file spectrum00484-21_supp_1_seq17.pdf]

Table S1. Oligonucleotide primers used in real-time PCR in cell line and mice.

| Target gene                      | Primer designation  | Oligonucleotide sequence (5'-3') | Product size (bp) |
|----------------------------------|---------------------|----------------------------------|-------------------|
| <b>m-TLR-2</b>                   | Tlr <sub>2</sub> -F | TCCTGCGAACTCCTATCC               | 151               |
|                                  | Tlr <sub>2</sub> -R | CCTGGTGACATTCCAAGAC              |                   |
| <b>m-TLR-4</b>                   | Tlr <sub>4</sub> -F | GCCTTTCAGGGAATTAAGCTCC           | 114               |
|                                  | Tlr <sub>4</sub> -R | GATCAACCGATGGACGTGTAAA           |                   |
| <b>m-TNF-<math>\alpha</math></b> | Tnf-F               | AACAACACTACTCAGAAACACAAG         | 130               |
|                                  | Tnf-R               | GCAGAACTCAGGAATGGA               |                   |
| <b>m-TGF-<math>\beta</math></b>  | Tgfb-F              | AATTCCTGGCGTTACCTT               | 116               |
|                                  | Tgfb-R              | TGTATTCCGTCTCCTTGG               |                   |
| <b>m-<math>\alpha</math>-SMA</b> | Sma-F               | CTGCCGAGCGTGAGATTG               | 122               |
|                                  | Sma-R               | AGGCAGTTCGTAGCTCTTCT             |                   |
| <b>m-Col1a1</b>                  | Col1-F              | GGGGCAAGACAGTCATCGAA             | 144               |
|                                  | Col1-R              | GGGTGGAGGGAGTTTACACG             |                   |
| <b>m-TIMP1</b>                   | Timp-R              | AGTGTTTCCCTGTTTATCTATCC          | 105               |
|                                  | Timp-R              | AAGTGACGGCTCTGGTAG               |                   |
| <b>m-PDGF</b>                    | Pdgf-F              | CACCACCGCAGTGTCAAG               | 116               |
|                                  | Pdgf-R              | AGGTTGGAGGTTCGCACAT              |                   |
| <b>m-RPL-19</b>                  | Rpl-F               | TCAGCCACAACATTCTCA               | 138               |
|                                  | Rpl-R               | GCACCTCCAACAGTAAGT               |                   |
| <b>m-HPRT</b>                    | Hprt-F              | TCAGTCAACGGGGGACATAAA            | 142               |
|                                  | Hprt-R              | GGGGCTGTACTGCTTAACCAG            |                   |
| <b>TLR-2</b>                     | Tlr <sub>2</sub> -F | TTATCCAGCACACGAATACACAG          | 160               |
|                                  | Tlr <sub>2</sub> -R | AGGCATCTGGTAGAGTCATCAA           |                   |
| <b>TLR-4</b>                     | Tlr <sub>4</sub> -F | AGACCTGTCCCTGAACCCTAT            | 147               |
|                                  | Tlr <sub>4</sub> -R | CGATGGACTTCTAAACCAGCCA           |                   |
| <b>TGF-<math>\beta</math></b>    | Tgfb-F              | GCACAACCTCCGGTGACATCAA           | 86                |
|                                  | Tgf-R               | CAATTCCTGGCGATACCTCAG            |                   |
| <b><math>\alpha</math>-SMA</b>   | Sma-F               | ATGATGCTGTTGTAGGTG               | 142               |
|                                  | Sma -R              | TTGAGAAGAGTTACGAGTTG             |                   |
| <b>Col1a1</b>                    | Col1-F              | TTACACAAGGAACAGAACA              | 91                |
|                                  | Col1-R              | CGACAAAGCAGAAACATC               |                   |

|              |         |                         |     |
|--------------|---------|-------------------------|-----|
| <b>TIMP1</b> | Timp-F  | CTATCAGCCACAGCAACAACAGG | 82  |
|              | Timp-R  | GCCCAGAGAGACACCAGAGAAC  |     |
| <b>GAPDH</b> | GAPDH-F | TGGAAGATGGTGATGGGATT    | 211 |
|              | GAPDH-R | TCAACGGATTTGGTCGTATTG   |     |

**Table S2.** Oligonucleotide primers used for the gut microbiota analysis.

| Target gene                                 | Primer designation | Oligonucleotide sequence (5'-3') | Product size (bp) |
|---------------------------------------------|--------------------|----------------------------------|-------------------|
| <b>Universal</b>                            | Uni-F              | ACTCCTACGGGAGGCAGCAGT            | 1                 |
|                                             | Uni-R              | ATTACCGCGGCTGCTGGC               |                   |
| <b>Firmicute</b>                            | Firm-F             | GGAGYATGTGGTTTAATTCGAAGCA        | 2                 |
|                                             | Firm-R             | AGCTGACGACAACCATGCAC             |                   |
| <b>Bacteroidetes</b>                        | Bactero-F          | GTTTAATTCGATGATACGCG             | 2                 |
|                                             | Bactero-R          | TTAAGCCGACACCTCACG               |                   |
| <b>Fusobacteria</b>                         | Fuso-F             | GATCCAGCAATTCTGTGTG              | 3                 |
|                                             | Fuso-R             | CGAATTTACCTCTACACTTG             |                   |
| <b>Actinobacteria</b>                       | Actino-F           | GCGACCTATCAGCTTGTT               | 3                 |
|                                             | Actino-R           | CCGCCTACGAGCTCTTTACGC            |                   |
| <b>Clostridia</b>                           | Ccl-F              | AAAGGAAGATTAATACCGCATA           | 4                 |
|                                             | Ccl-R              | TTCTTCTAATCTCTACGCA              |                   |
| <b><math>\gamma</math>-Proteobacteria</b>   | Gamma-F            | CATGCCGCGTGTGTGAA                | 5                 |
|                                             | Gamma -R           | ACTCCCCAGGCGGTCDACTTA            |                   |
| <b><math>\alpha</math>-Proteobacteria</b>   | Alpha-F            | GGTAAGGTTCTGCGCGTT               | 5                 |
|                                             | Alpha-R            | GGTAAGGTTCTGCGCGTT               |                   |
| <b><math>\epsilon</math>-Proteobacteria</b> | Epsilon-R          | TGGTGTAGGGGTAATAATCCG            | 3                 |
|                                             | Epsilon-R          | AGGTAAGGTTCTTCGYGTATC            |                   |
| <b><i>Enterobacteriaceae</i></b>            | Enterob-F          | CGTCGCAAGMMCAAAGAG               | 3                 |
|                                             | Enterob-R          | TTACCGCGGCTGCTGGCAC              |                   |
| <b><i>Ruminococcaceae</i></b>               | Rum-F              | GGCGGCYTRCTGGGCTTT               | 6                 |
|                                             | Rum-R              | CCAGGTGGATWACTTATTGTGTTAA        |                   |
| <b><i>Peptostreptococcus</i></b>            | Pepto-F            | ATAGGAGGAAGCCCTGGCTAAA           | This study        |
|                                             | Pepto-R            | CTCCACGCTTTGACACCTGA             |                   |
| <b><i>Prevotellaceae</i></b>                | Prevo-F            | CACCAAGGCGACGATCA                | 7                 |
|                                             | Prevo-R            | GGATAACGCCTGGACCT                |                   |
| <b><i>Methanobrevibacter spp.</i></b>       | Methano-F          | CGATGCGGACTTGGTGTG               | 8                 |
|                                             | Methano-R          | TGTCGCCTCTGGTGAGATGTC            |                   |

|                             |           |                          |    |
|-----------------------------|-----------|--------------------------|----|
| <i>A. muciniphila</i>       | Am-F      | CAGCACGTGAAGGTGGGGAC     | 9  |
|                             | Am-R      | CCTTGCGGTTGGCTTCAGAT     |    |
| <i>Alistipes spp.</i>       | Alis-F    | TTAGAGATGGGCATGCGTTGT    | 10 |
|                             | Alis-R    | TGAATCCTCCGTATT          |    |
| <i>Veillonella spp.</i>     | Veillo-F  | ACAACCTGCCCTTCAGA        | 11 |
|                             | Veillo-R  | CGTCCCATTAAACAGAGCTT     |    |
| <i>Enterococcus spp.</i>    | Enteroc-F | CCCTTATTGTTAGTTGCCATCATT | 12 |
|                             | Enteroc-R | ACTCGTTCTACTTCCCATTGT    |    |
| <i>F. prausnitzii</i>       | Fp-F      | GATGGCCTCGCGTCCGATTAG    | 13 |
|                             | Fp-R      | CCGAAGACCTTCTTCCTCC      |    |
| <i>E. coli</i>              | GAPDH-F   | TGGAAGATGGTGATGGGATT     | 14 |
|                             | GAPDH-R   | TCAACGGATTTGGTTCGTATTG   |    |
| <i>Bifidobacterium spp.</i> | Bifido-F  | GGGATGCTGGTGTGGAAGAG     | 12 |
|                             | Bifido-R  | TGCTCGCGTCCACTATCCAG     |    |
| <i>Lactobacillus spp.</i>   | Lacto-F   | TGGATGCCTTGGCACTAG       | 12 |
|                             | Lacto-R   | AAATCTCCGGATCAAAGCTTAC   |    |
| <i>Roseburia spp.</i>       | Rose-F    | TACTGCATTGGAAACTGTCTG    | 7  |
|                             | Rose-R    | CGGCACCGAAGAGCAAT        |    |

The nucleotides in bold type represent: Y, C or T; K, G or T; M, A or C; D, A or G or T; R, A or G.

Figure S1. Flow chart for database search.

Figure S2. Gene expression of liver fibrosis markers in LX-2 cells upon treatment with different MOIs of live, pasteurized *A. muciniphila* and its EVs. Relative gene expression of fibrosis markers were markedly increased after treatment of LX-2 cells with LPS in comparison with quiescence condition. The mRNA level of an anti-fibrosis factors were decreased in LPS stimulated LX-2 cells treated with different supplementation of *A. muciniphila*. Data are shown as the mean  $\pm$  SEM. \* $P < 0.05$ , \*\* $P < 0.01$ , \*\*\* $P < 0.001$  and by post hoc one-way ANOVA statistical analysis.

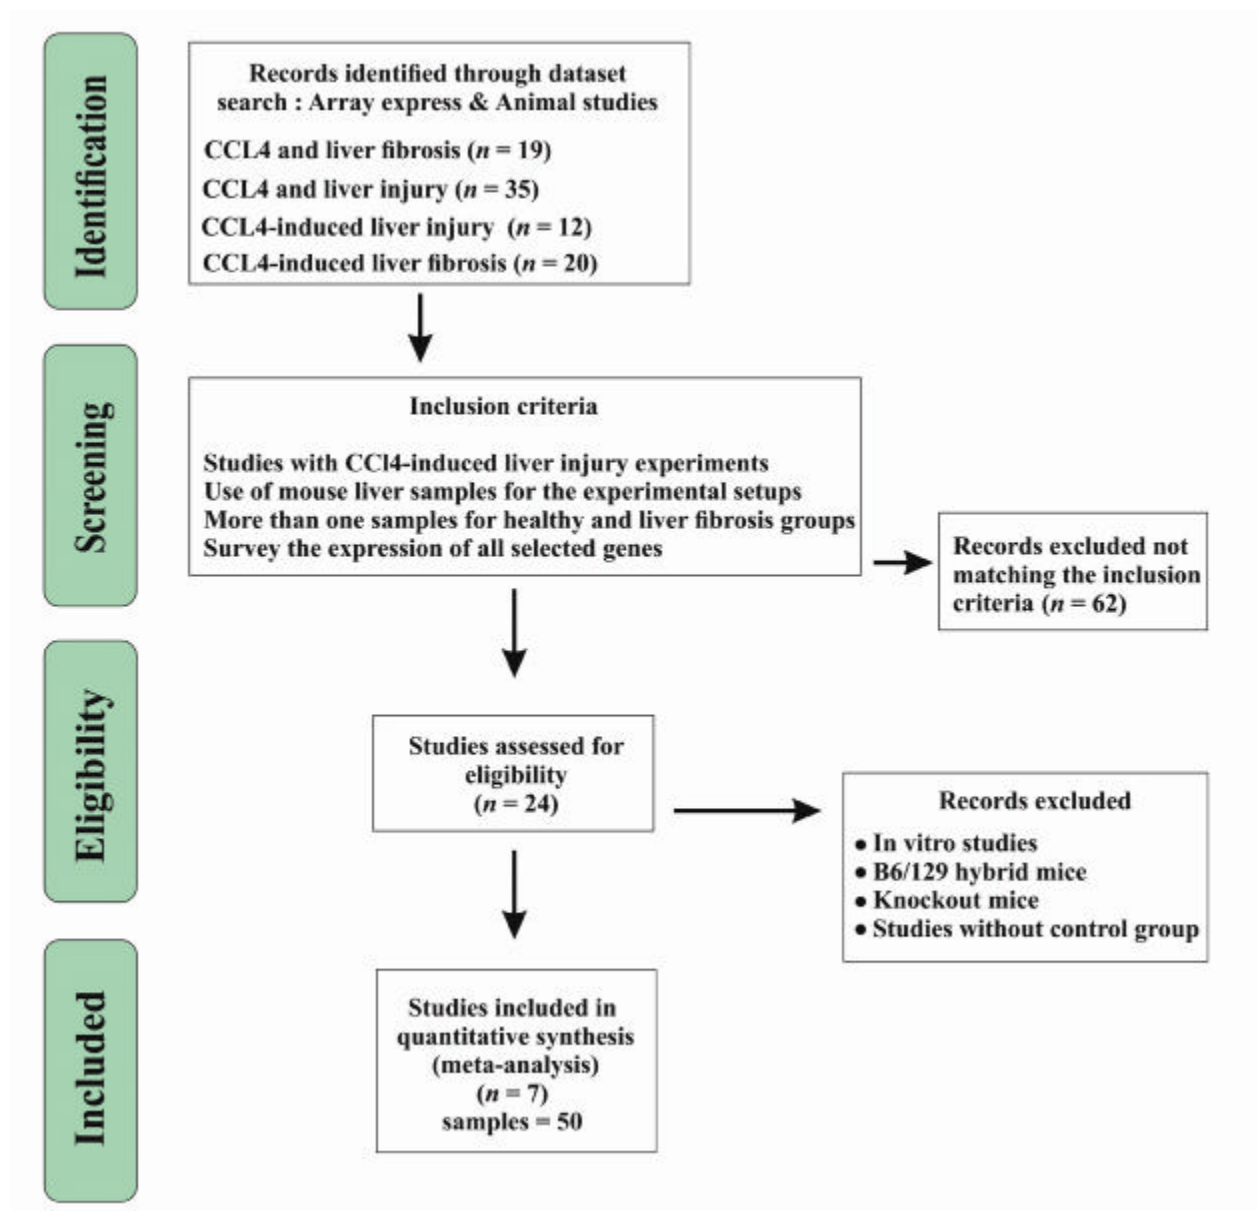

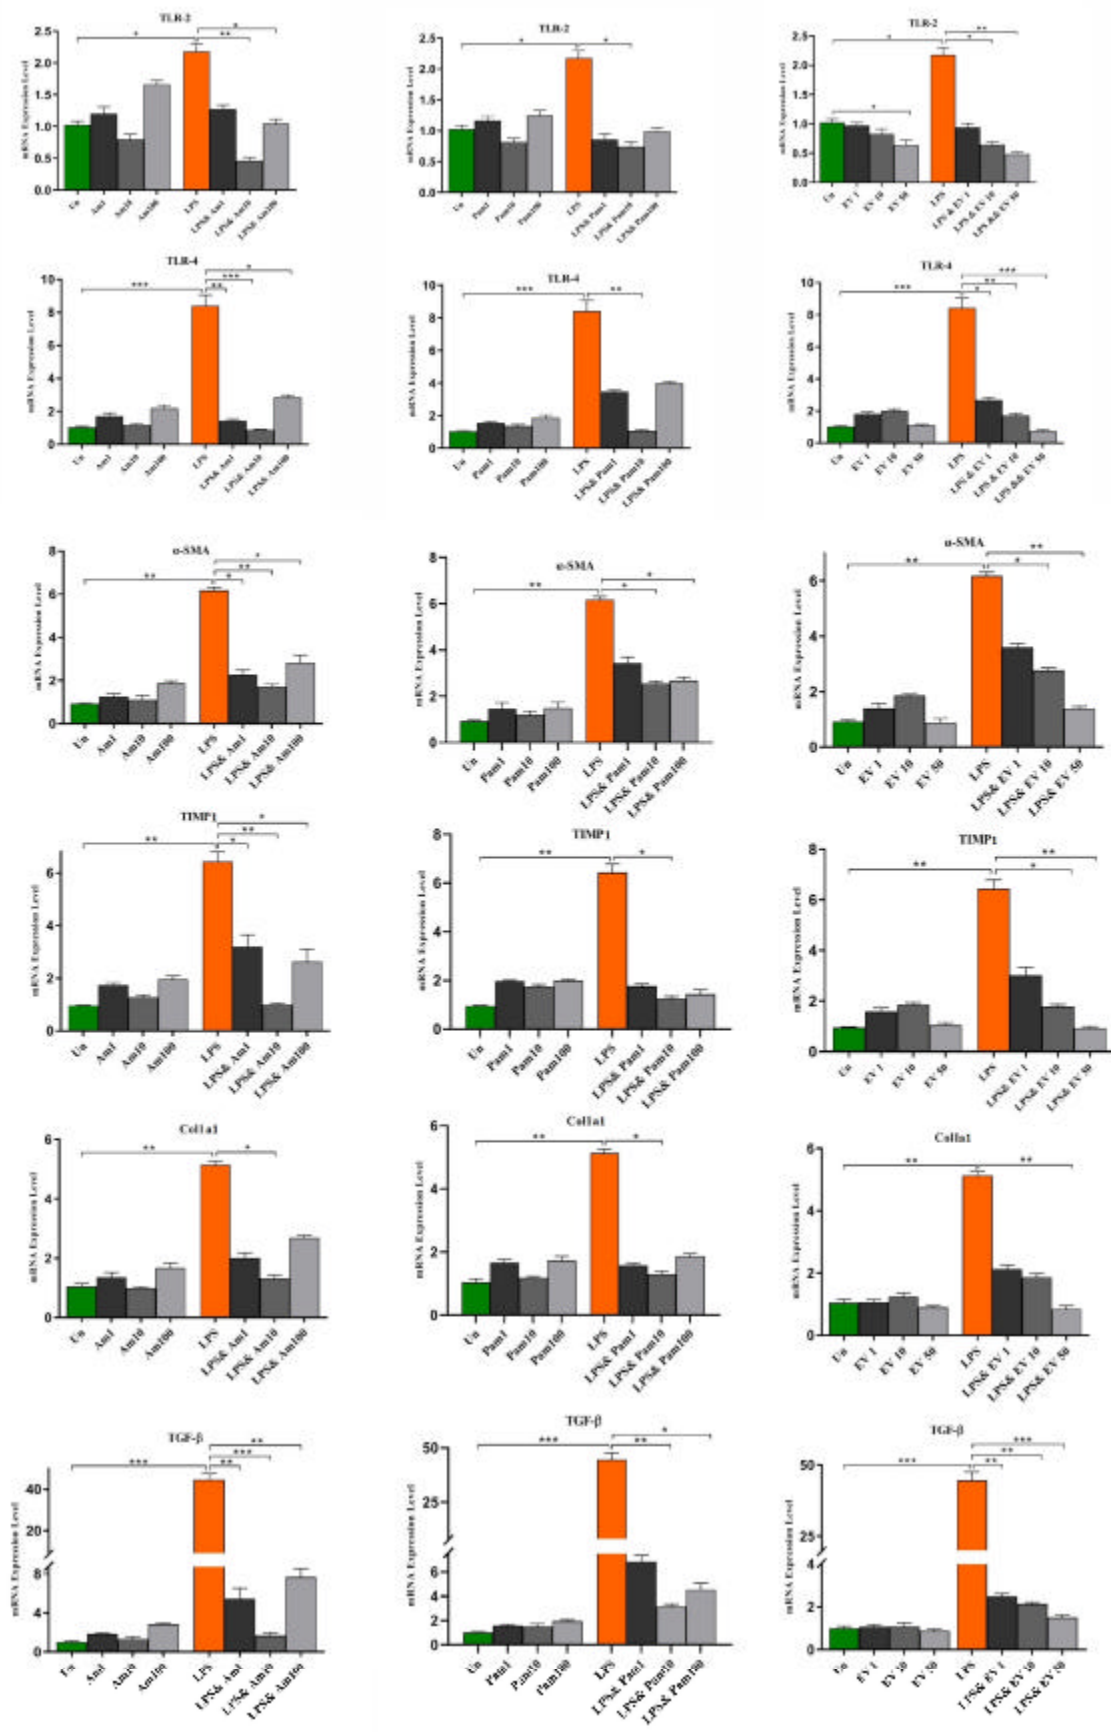

## Reference

- 1 Moraes, J. G. d., Motta, M. E. F. d. A., Beltrão, M. F. d. S., Salviano, T. L. & Silva, G. A. P. d. Fecal microbiota and diet of children with chronic constipation. *International journal of pediatrics*. 2016; **2016**, p. 6787269.
- 2 Yang, Y.-W. *et al.* Use of 16S rRNA gene-targeted group-specific primers for real-time PCR analysis of predominant bacteria in mouse feces. *Applied and environmental microbiology*. 2015; **81**, p.6749-6756.
- 3 Hermann-Bank, M. L., Skovgaard, K., Stockmarr, A., Larsen, N. & Mølbak, L. The Gut Microbiotassay: a high-throughput qPCR approach combinable with next generation sequencing to study gut microbial diversity. *BMC genomics*. 2013; **14**, p.788.
- 4 Matsuki, T. *et al.* Development of 16S rRNA-gene-targeted group-specific primers for the detection and identification of predominant bacteria in human feces. *Applied and environmental microbiology*. 2002; **68**, p.5445-5451.
- 5 De Gregoris, T. B., Aldred, N., Clare, A. S. & Burgess, J. G. Improvement of phylum-and class-specific primers for real-time PCR quantification of bacterial taxa. *Journal of microbiological methods*. 2011; **86**, p.351-356.
- 6 Omar, J. M., Chan, Y.-M., Jones, M. L., Prakash, S. & Jones, P. J. Lactobacillus fermentum and Lactobacillus amylovorus as probiotics alter body adiposity and gut microflora in healthy persons. *Journal of functional foods*. 2013; **5**, p.116-123.
- 7 Larsen, N. *et al.* Gut microbiota in human adults with type 2 diabetes differs from non-diabetic adults. *PloS one*. 2010; **5**, e9085.
- 8 Verma, R., Verma, A. K., Ahuja, V. & Paul, J. Real-time analysis of mucosal flora in patients with inflammatory bowel disease in India. *Journal of clinical microbiology*. 2010; **48**, p.4279-4282.
- 9 Schneeberger, M. *et al.* Akkermansia muciniphila inversely correlates with the onset of inflammation, altered adipose tissue metabolism and metabolic disorders during obesity in mice. *Scientific reports*. 2015; **5**, p.16643.
- 10 Vignæs, L. K., Brynskov, J., Steenholdt, C., Wilcks, A. & Licht, T. R. Gram-negative bacteria account for main differences between faecal microbiota from patients with ulcerative colitis and healthy controls. *Beneficial microbes*. 2012; **3**, p.287-297.
- 11 Rinttilä, T., Kassinen, A., Malinen, E., Krogius, L. & Palva, A. Development of an extensive set of 16S rDNA-targeted primers for quantification of pathogenic and indigenous bacteria in faecal samples by real-time PCR. *Journal of applied microbiology*. 2004; **97**, p.1166-1177.

- 12 Wang, I.-K. *et al.* Real-time PCR analysis of the intestinal microbiotas in peritoneal dialysis patients. *Applied and environmental microbiology*. 2012; **78**, p.1107-1112.
- 13 Fitzgerald, C. B. *et al.* Comparative analysis of *Faecalibacterium prausnitzii* genomes shows a high level of genome plasticity and warrants separation into new species-level taxa. *BMC genomics*. 2018; **19**, p.931.
- 14 Bartosch, S., Fite, A., Macfarlane, G. T. & McMurdo, M. E. Characterization of bacterial communities in feces from healthy elderly volunteers and hospitalized elderly patients by using real-time PCR and effects of antibiotic treatment on the fecal microbiota. *Applied and environmental microbiology*. 2004; **70**, p.3575-3581.
